# Supplementary figures and images for: Deficiency of tumour necrosis factor-related apoptosis-inducing ligand exacerbates lung injury and fibrosis
Source: PubMed Central journal article supplement — Thorax. 2012 Apr 11;67(9):796–803. doi: 10.1136/thoraxjnl-2011-200863 (PMC3426075; doi:10.1136/thoraxjnl-2011-200863), 2012-04-11

**Figure 1**

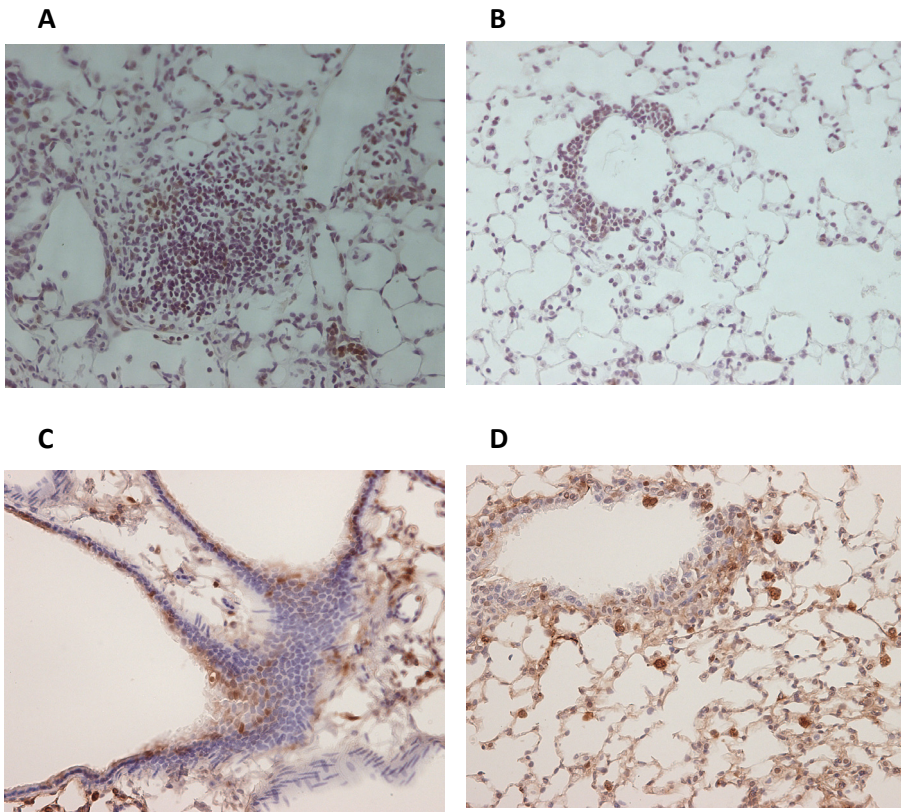

Supplement: thoraxjnl-2011-200863-s2.pdf [file thoraxjnl-2011-200863-s2.pdf]
